# 1 **Variation in error-based and reward-based human motor** 2 **learning is related and associated with entorhinal volume**

3  
4 Anouk J. de Brouwer<sup>1</sup>, Mohammad R. Rashid<sup>2</sup>, J. Randall Flanagan<sup>1,3</sup>, Jordan Poppenk<sup>1,3</sup>,  
5 Jason P. Gallivan<sup>1,3,4</sup>

6  
7 1 Centre for Neuroscience Studies, Queen's University, Kingston, ON, Canada

8 2 School of Computing, Queen's University, Kingston, ON, Canada

9 3 Department of Psychology, Queen's University, Kingston, ON, Canada

10 4 Department of Biomedical and Molecular Sciences, Queen's University, Kingston, ON, Canada

11

12 Corresponding author: Anouk J. de Brouwer ([ajdebrouwer@gmail.com](mailto:ajdebrouwer@gmail.com))

## 13 **Abstract**

14 Error-based and reward-based processes are critical for motor learning, and are thought to be  
15 supported via distinct neural pathways. However, recent behavioral work in humans suggests that  
16 both learning processes are supported by cognitive strategies and that these contribute to  
17 individual differences in motor learning ability. While it has been speculated that medial temporal  
18 lobe regions may support this strategic component to learning, direct evidence is lacking. Here  
19 we first show that faster and more complete learning during error-based visuomotor adaptation is  
20 associated with better learning during reward-based shaping of reaching movements. This result  
21 suggests that strategic processes, linked to faster and better learning, drive individual differences  
22 in both error-based and reward-based motor learning. We then show that right entorhinal cortex  
23 volume was larger in good learning individuals—classified across both motor learning tasks—  
24 compared to their poorer learning counterparts. This suggests that strategic processes underlying  
25 both error- and reward-based learning are linked to neuroanatomical differences in entorhinal  
26 cortex.

27

28 **Keywords:** motor adaptation, visuomotor rotation, explicit learning, reinforcement, individual  
29 differences

## 30 **Significance Statement**

31 While it is widely appreciated that humans vary greatly in their motor learning abilities, little is  
32 known about the processes and neuroanatomical bases that underlie these differences. Here,  
33 using a data-driven approach, we show that individual variability in error-based and reward-based  
34 motor learning is tightly linked, and related to the use of cognitive strategies. We further show that  
35 structural differences in entorhinal cortex predict this intersubject variability in motor learning, with  
36 larger entorhinal volumes being associated with better overall error-based and reward-based  
37 learning. Together, these findings provide support for the notion that the ability to recruit strategic  
38 processes underlies intersubject variability in both error-based and reward-based learning, which  
39 itself may be linked to structural differences in medial temporal cortex.

## 40 **Introduction**

41 The human brain's capacity to learn new motor commands is fundamental to almost all activities  
42 we engage in. It is not only essential when we acquire novel skills, such as learning to play a  
43 musical instrument, but is also required on a daily basis as we refine existing motor skills and  
44 adapt to changes in our environment. To date, the vast majority of studies on motor learning have  
45 focused on characterizing learning across individuals at the group-level, treating individual  
46 variability as noise that obscures the main processes underlying learning. More recently, however,  
47 there has been increased interest in the potential sources of such intersubject variability (1–4), as  
48 they may provide insight into the specific mechanisms by which different people learn. While a  
49 handful of studies have helped uncover several of these mechanisms (1, 5, 6), little is known  
50 about their underlying neuroanatomical basis.

51  
52 Traditionally, motor learning has been viewed as an implicit, procedural process of the motor  
53 system, with neural studies focusing on brain areas in the frontoparietal cortex, striatum or  
54 cerebellum (7–9). The putative role of cognitive brain circuits in driving motor learning has often  
55 been neglected (though see 10). Ever since the classic finding that patient H.M. showed learning  
56 of a visuomotor skill despite a bilateral medial temporal lobectomy (11, 12), motor and cognitive  
57 brain circuits have been viewed as operating largely independently of one another. Only relatively  
58 recently have behavioral studies demonstrated the myriad ways in which cognitive systems  
59 support motor learning — showing, for example, that processes related to strategy use and  
60 declarative memory can bolster, or interfere with, aspects of motor learning (13–16).

61

62 When considering the neural bases of such interactions, it is important to distinguish between two  
63 main forms of learning. Error-based learning is the form of learning by which we refine and adjust  
64 our movements to changes in the body or the environment based on observable errors, such as  
65 when missing the bullseye in archery. Such learning is thought arise from two separate processes  
66 acting in parallel: An implicit process that is driven by the error between predicted and observed  
67 sensory feedback (17, 18) and an explicit process that is driven by the error between the target  
68 and the sensory feedback (i.e., the task error) (19). The implicit process is nonconscious (i.e.,  
69 resistant to voluntary control), adapts and de-adapts gradually and is reliant on the cerebellum  
70 (20–22). The explicit process, by contrast, is declarative in nature, and linked to the use of  
71 cognitive strategies resulting in large, rapid changes during early learning (13, 23), such as when  
72 intentionally aiming the bow slightly to the left of the bulls eye when shooting in a strong wind.  
73 Recent evidence further suggests that, while the implicit component to learning is fairly stable  
74 across tasks and participants (24, 25), individual differences in the rate of learning largely reflects  
75 whether, and how effectively, a cognitive strategy is implemented (2, 3). To date, the neural  
76 systems associated with this explicit component of learning remain rather speculative. Evidence  
77 from neuroimaging, aging, and lesion studies have implicated areas in the prefrontal cortex in  
78 explicit strategies (7, 26–28). In addition, it has been speculated, but not yet shown, that regions  
79 in the MTL, given their role in declarative processes, may also be involved in the explicit  
80 component to motor learning (3, 7, 29).

81  
82 Reward-based learning is the form of learning that underlies the acquisition of many motor skills,  
83 such as when learning to swing on a playground set or learning to drink from a straw. When  
84 learning such skills, the mapping between success (reward) and motor commands is often highly  
85 complex, with no single error providing information about the required change in motor  
86 commands. Thus, in such cases, the brain must figure out the motor commands that increase  
87 success, often through active exploration and exploitation of the acquired knowledge (30–32).  
88 The neural circuits that drive reward-based learning are thought to be different from those involved  
89 in error-based learning, and critically rely on the basal ganglia and striatum (8, 33, 34). However,  
90 recent behavioral work suggests a key role for explicit strategies in reward-based motor learning  
91 (35, 36) and there is some emerging evidence from human neuroimaging to suggest links  
92 between the MTL and reward-based learning (37, 38). Insofar as active motor exploration may  
93 involve the use of strategies, it is plausible that MTL structures also contribute to success in  
94 reward-based motor learning.

95

96 To date, the role of MTL regions in declarative memory and spatial navigation have been well  
97 established (39–42). In humans, for example, anatomical imaging methods have demonstrated  
98 clear links between individual differences in hippocampus and/or entorhinal cortex volume and  
99 performance in memory and navigation tasks (43–50). It is increasingly recognized, however, that  
100 the hippocampal-entorhinal system is not solely dedicated to declarative memory or spatial  
101 navigation processes per se, but can support more abstract relational representations (51–54).  
102 Influential theories posit that this system forms a flexible ‘cognitive’ map for representing goals  
103 and relating objects and actions within a spatial context (41, 55, 56). Such maps are likely to be  
104 critical when forming new action-outcome associations, as is the case when searching for and  
105 implementing strategies during motor learning. Extending this notion of a cognitive map, here we  
106 asked whether individual differences in performance during motor learning are linked to  
107 hippocampal and entorhinal volume in humans. To examine this, we had human participants  
108 undergo a structural neuroimaging session prior to performing separate error-based and reward-  
109 based learning tasks, both known to elicit the use of strategies during learning. We show that  
110 learning performance in both motor tasks is directly related and that faster and better overall  
111 learning across tasks is associated with larger entorhinal cortex volume.

## 112 **Results**

113 In order to determine the relationship between motor performance in reward-based and error-  
114 based learning tasks, and the extent to which the size of hippocampal and entorhinal cortex may  
115 be associated to such learning, we collected high-resolution structural MRI scans from  
116 participants (N=34) prior to performing two separate motor learning tasks outside the scanner. In  
117 the reward-based learning task, inspired by Dam and colleagues (57), participants learned to copy  
118 an invisible, curved path through trial and error, using only a score (between 0 and 100 points) to  
119 improve their performance. This score, presented at the end of each trial, indicated how closely  
120 the participants’ drawn path corresponded to the invisible path (Fig. 1B). Participants drew these  
121 paths on a digital drawing tablet from a start to a target position displayed on a vertical monitor  
122 (Fig. 1A), and were instructed to maximize their score. To obtain a representative measure of  
123 each participant’s reward-based learning rate and ability, we had participants perform this task  
124 for 12 different invisible paths, with 20 attempts for each. Participants were naive to the possible  
125 shapes of the paths, which were shaped as single curves (i.e., half sine waves) and double curves  
126 (i.e., full sine waves) between the start and target position, with different amplitudes (see Fig. 1C).  
127 Because participants received only visual feedback about their path trajectory—and never the

128 rewarded path—they did not receive error-based information that could be used to guide learning.  
 129 By design, this reward-based task requires implementing a search strategy to first find the invisible  
 130 path and then refine the drawn path, and we thus predict that participants who perform well in this  
 131 task are better at implementing such strategies.

132  
 133 In the error-based learning task, we used the classic visuomotor rotation learning paradigm (58),  
 134 wherein participants had to adjust their movements to a 45° rotation of the cursor movement,  
 135 which represented participants' hand movements, in order to hit visual targets (Fig. 1D).  
 136 Participants performed center-out reaching movements on the drawing tablet to one of eight  
 137 targets displayed on a monitor. After a baseline phase with veridical cursor feedback, participants  
 138 were exposed to the 45° visuomotor rotation of the movement of the cursor, requiring an  
 139 adjustment of the reaching movement in the opposite direction. Learning in this task consists of  
 140 two components: automatic, implicit adjustments of the reach direction, resulting in gradual  
 141 changes in performance, and the implementation of an aiming strategy to counteract the rotation,  
 142 resulting in fast changes in performance (19, 23). Our previous work has shown (3) — and we  
 143 predict here — that faster and more complete learning across participants will be largely driven  
 144 by the use of an aiming strategy, used to counteract the rotation. At the end of the first block of  
 145 rotation trials, we assessed this aiming strategy by asking participants to report the intended  
 146 aiming angle by turning a knob with their left hand to rotate a line on the screen at the start of the  
 147 trial, before executing the reach (19). Learning was then 'washed out' by restoring veridical cursor  
 148 feedback, after which the visuomotor rotation was re-instantiated to assess the rate of re-learning.  
 149

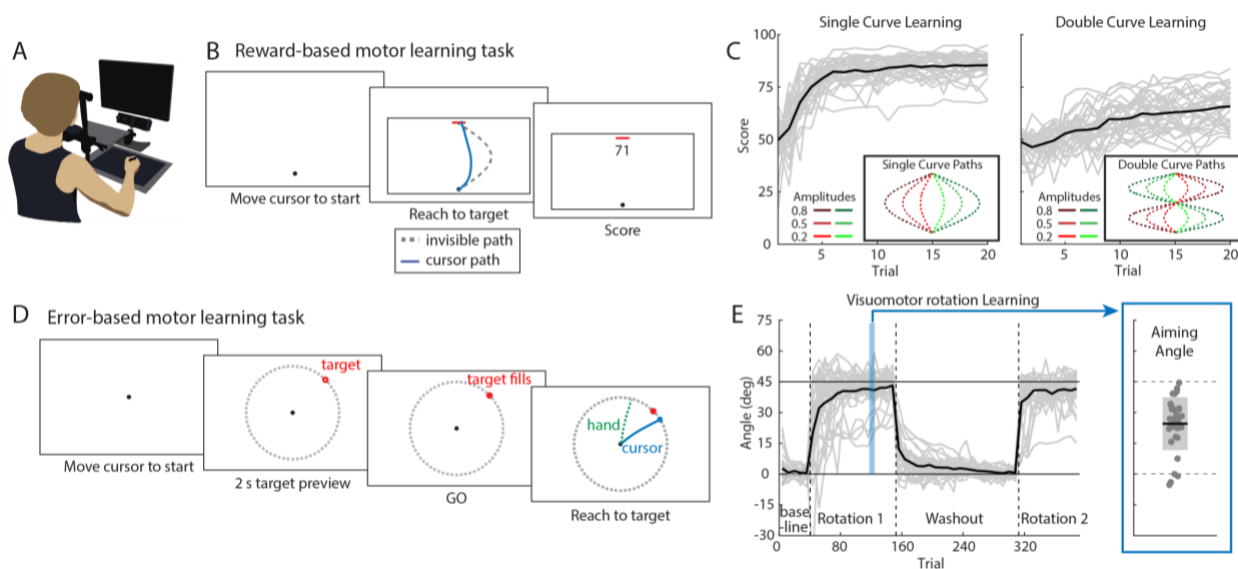

150

151 **Figure 1. Experimental setup and task.** (A) Setup. Participants made reaching movements by sliding a  
152 pen across a digitizing tablet without vision of the hand. The stimuli and a cursor representing the hand  
153 position were presented on a monitor. (B) Reward-based motor learning task. Participants were instructed  
154 to 'copy' an invisible path (dashed grey line), with a score between 0 and 100 indicating how close their  
155 drawn path (blue line) was to the hidden path. (C) Learning across trials for single (left panel) and double  
156 invisible paths (right panel). Each grey line is an individual participant (n=33), with the black line  
157 representing the average across participants. Insets depict the six single curve invisible paths and the six  
158 double curve invisible paths used in the task. (D) Error-based motor learning task. Participants made center-  
159 out reaching movements to visual targets (red dot) on a ring of landmarks (small grey dots) with veridical  
160 cursor feedback (not shown) or under a 45° rotation of the cursor feedback (blue line; hand direction is  
161 shown in green). (E) Learning curve (left panel) across the baseline, rotation 1, washout, and rotation 2  
162 block, and reported aiming angle (right panel) measured at the end of the first rotation block. Each grey line  
163 or dot represents an individual participant (n=33), the black lines represent the mean across participants.  
164 The shaded grey area in the right panel represents the standard deviation.

### 165 ***Performance in reward-based and error-based motor learning is related***

166 The black traces in Figure 1C and 1E show the learning curves, averaged across all participants,  
167 for the reward-based and error-based learning tasks, respectively. These figures demonstrate  
168 that participants learned to increase their scores in the reward-based task and change their hand  
169 angle in the error-based task across trials. However, these group-averaged results may be  
170 somewhat misleading, as they obscure significant intersubject variability in both the rates and  
171 levels of learning obtained (see gray traces in Fig. 1C,E, which depict single participants). For  
172 example, Figure 2 shows the behavior of two participants, one 'good' overall learner and one  
173 'poor' overall learner, in both the reward-based learning task and the error-based learning task.  
174 Figure 2A and 2B depict the paths that the participants drew (left panel) and the corresponding  
175 scores (right panel), in two blocks of the reward-based learning task for a single (top) and double  
176 curve (bottom) with the largest amplitude (blocks 4 and 11 for the participant in Fig. 2A; blocks 11  
177 and 10 for the participant in Fig. 2B). While both participants quickly converged on a good solution  
178 for the single curve, resulting in scores close to 100, the movements of the participant in Figure  
179 2A resemble the invisible curve more closely. In addition, while the participant in Figure 2A quickly  
180 converges upon a solution that has a similar shape to the invisible double curve, the participant  
181 in Figure 2B never learns to draw that same double curve, and their score remains low.

182  
183 Figure 2C and 2D show, for the same two participants, the median hand angle (in blue) for each  
184 bin of eight trials across the error-based learning task, as well as the reported aiming angle (in

185 purple) assessed near the end of the first rotation block. Appropriate corrections for the  
186 visuomotor rotation are plotted as positive values; that is, a hand angle of 45° corresponds to full  
187 compensation for the rotation. The participant in Figure 2C shows quick adjustment of the hand  
188 angle towards 45° in the first and second rotation block, and a quick return towards 0° in the  
189 washout block. Such fast learning is associated with a large contribution of an aiming strategy,  
190 consistent with their reported aiming angles around 39°. The participant in Figure 2D, by contrast,  
191 shows only gradual adjustments of the hand angle in the rotation and washout blocks, and  
192 correspondingly reports aiming values around 0°, suggesting that learning in this participant is  
193 mainly driven by the implicit process. Overall, the participant in Figure 2A,C showed better  
194 learning performance in both tasks than the participant in Figure 2B,D.

195  
196 For each participant, we obtained six learning scores for the reward-based learning task (single  
197 and double curves  $\times$  three amplitudes, positive and negative amplitudes were averaged) and  
198 seven learning scores for the error-based learning task (early and late learning in rotation block  
199 1, washout, and rotation block 2, and the reported aiming angle). Across the entire group, we  
200 found significant correlations in the learning scores within and between the two tasks (Fig. 2E).  
201 To derive single participant measures of learning that capture these relationships across both  
202 tasks, and that can be used to relate learning to the neuroanatomical data collected in these same  
203 participants, we performed a principal component analysis (PCA) on the learning scores (see  
204 *Methods* for details). We found that the first (PC1) and second principal components (PC2)  
205 explained 42.4% and 13.4% of the variance in the data, respectively. The projection plots in Figure  
206 2F allows for straightforward interpretation of these PCs, directly showing both the magnitude and  
207 sign of the loading of each of our 13 learning measures (six from the reward-based task and  
208 seven from the error-based task) onto PC1 and PC2. PC1 has positive loadings for all of the  
209 learning measures, indicating that this component captures overall learning performance. In other  
210 words, it provides a single measure that distinguishes between relatively 'good' and 'poor' learning  
211 performance in both the reward-based and error-based learning tasks. Indeed, PC1 shows  
212 significant positive correlations with all behavioral measures (ranging from  $r=0.37$  to  $r=0.77$ ,  
213  $p=0.032$  to  $p<0.001$ ). The second principal component (PC2) broadly distinguishes between  
214 performance in the reward-based and error-based learning task, with positive loadings for the  
215 reward-based learning scores, negative loadings for learning in the rotation blocks, and little  
216 contribution of learning in the washout blocks. However, it explains only a small portion of the  
217 behavioral variance (13.4%), limiting the interpretational value of this component and its use in  
218 further analyses. Taken together, our approach demonstrates that performance in both tasks is

219 highly related; a single measure captures whether participants are good learners in the reward-  
 220 based learning and in the error-based learning task.  
 221

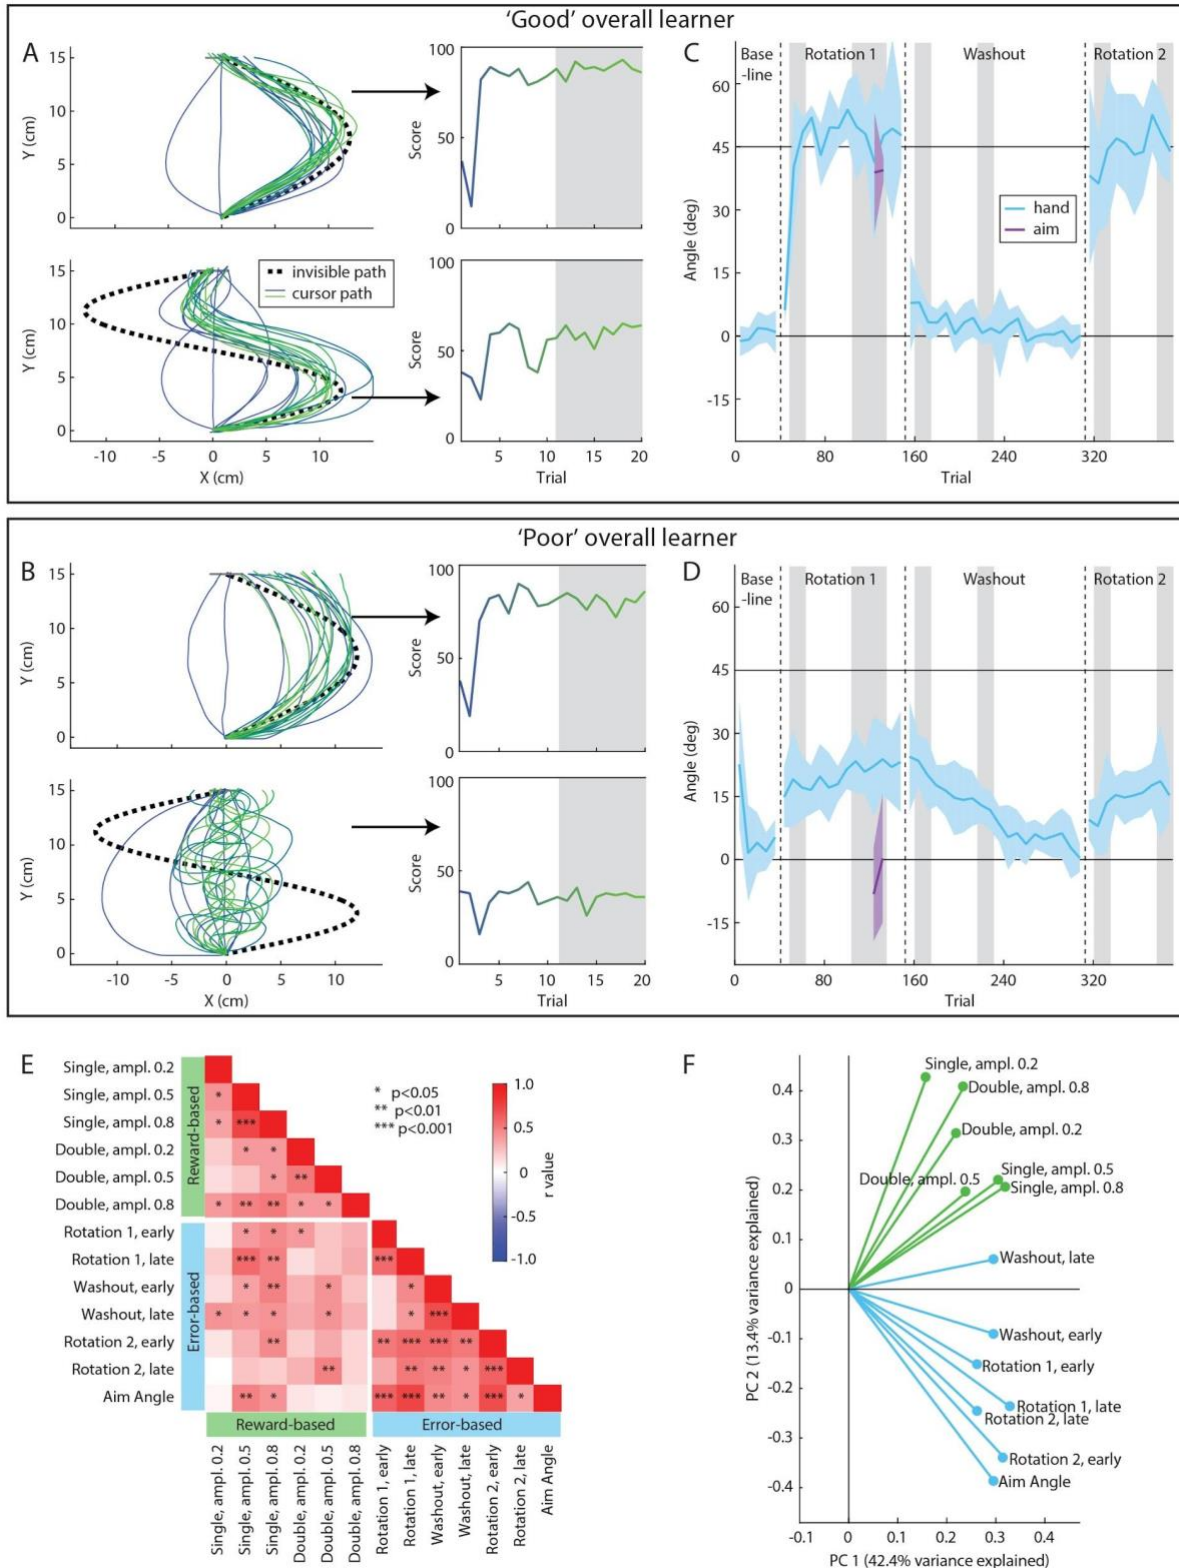

222



223 **Figure 2. Learning performance in the error-based and reward-based tasks is related and is**  
224 **captured by a single latent variable.** (A,C) Data of an example ‘good learner’. (A) shows the hidden path  
225 (dashed black line), drawn paths (blue and green lines), and score (blue to green gradient) for two blocks  
226 in the reward-based learning task. The median score in the last 10 trials of each block (grey shaded area)  
227 was used in further analyses. (C) shows the hand angle (light blue) and reported aiming angle (purple)  
228 relative to the target angle during the error-based learning task. Each data point represents the median of  
229 a set of eight trials, and the shading represents  $\pm$  one standard deviation. The mean scores across sets 2  
230 and 3 (early learning) and 9 and 10 (late learning) of the rotation and washout blocks were used in further  
231 analyses, as well as the averaged aiming angle (grey shaded areas). In the baseline and washout blocks,  
232 a hand angle of zero would result in a target hit, and in the rotation blocks, a hand angle of 45° results in  
233 perfect compensation of the rotated cursor path, and thus a target hit. (B,D) Same as (A,C), but for a ‘poor  
234 learner’. (E) Correlations between scores in the reward-based and error-based motor learning task across  
235 participants ( $n=33$ ). (F) Principal component analysis loadings for the first and second principal component.

### 236 ***Larger entorhinal volume is associated with better motor learning***

237 Having clearly established that performance in reward-based and error-based learning is related,  
238 our next aim was to determine whether such performance is associated with the neuroanatomy  
239 of the MTL. To this end, we performed multiple linear regression analyses to predict PC1 and  
240 PC2 based on the right and left hippocampus (HC) and entorhinal cortex (EC) volumes (Fig. 3AB),  
241 corrected for total intracranial volume (see *Methods*). We also included total intracranial (IC)  
242 volume in our model to account for a potential effect of overall head size. Figure 3C shows the  
243 standardized regression coefficients and 95% confidence interval of the regression models for  
244 each PC. For PC1—our measure of performance in both tasks—the model explained 36.0% of  
245 the variance in PC1 score (model  $F(5)=3.030$ ,  $p=0.027$ ; Table S1), with right EC volume being  
246 the only significant predictor of PC1 score ( $t=3.318$ ,  $p=0.003$ ). That is, greater right entorhinal  
247 volume corresponded with higher scores on PC1, or better learning in both tasks. Notably, we  
248 found no significant predictors of PC2 score (model  $F(5)=0.454$ ,  $p=0.806$ ,  $R_2=7.8\%$ ). This lack of  
249 effect might not be surprising given that the percentage of variance in our motor learning data that  
250 was explained by the second principal component was quite small (13.4%).

251  
252 As a secondary analysis, we performed a linear regression with the anterior and posterior  
253 hippocampus as separate predictors, as previous studies have reported differential relationships  
254 between these individual parts of the hippocampus and memory (e.g., 50). However, here we  
255 again did not find significant relationships between left and right aHC and pHC volume and the  
256 score on PC1 (model  $F(5)=0.358$ ,  $p=0.427$ ,  $R_2=6.2\%$ ) or PC2 ( $F(5)=0.939$ ,  $p=0.472$ ,  $R_2=14.8\%$ ;

257 Table S2). See the *Supplemental Results* for exploratory regression analyses using participants'  
258 striatal volumes as predictors.

259  
260 Taken together, the results of these regression analyses indicate that better performance in both  
261 reward-based and error-based learning is associated with larger right entorhinal volume.

262

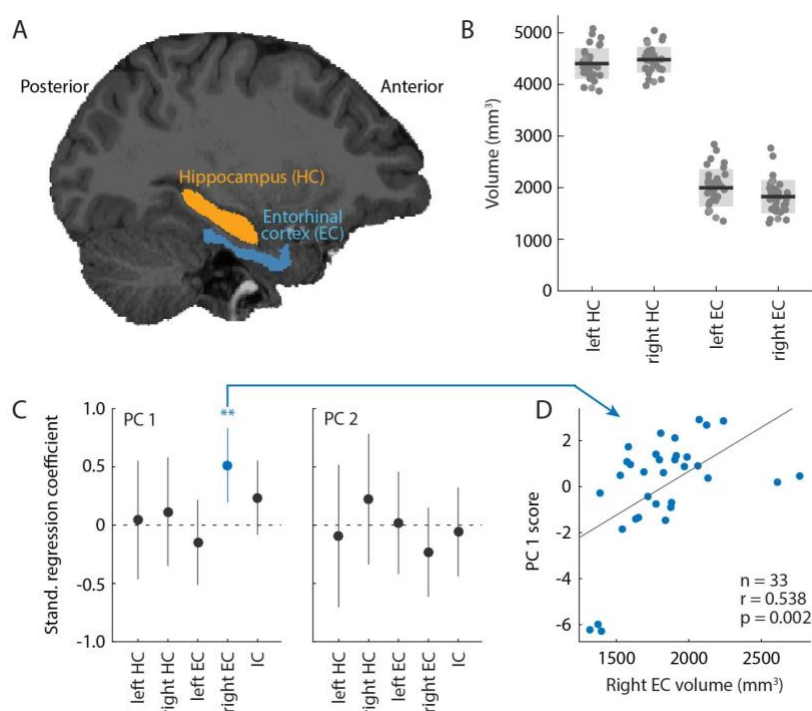

263  
264 **Figure 3. Larger entorhinal volumes are uniquely associated with better overall motor learning.** (A)  
265 Illustration of the segmented hippocampus (orange) and entorhinal cortex (blue) in an example participant.  
266 (B) Volume of the left (L) and right (R) hippocampus (HC) and entorhinal cortex (EC), corrected for total  
267 intracranial volume (see *Methods*). Each dot depicts an individual participant (n=33), the dark grey line  
268 indicates the mean across participants, and the light grey area indicates the standard deviation. (C)  
269 Standardized regression coefficients and their corresponding 95% confidence intervals of the regression  
270 models to predict principal component 1 (PC 1; left panel) and principal component 2 (PC 2; right panel)  
271 based on the left and right hippocampus and entorhinal volumes, and the total intracranial volume (IC). (D)  
272 Individual partial correlation between right entorhinal volume and PC 1 score. The line represents the best  
273 fit regression line.

## 274 Discussion

275 While previous work in motor learning has often studied error-based and reward-based learning  
276 processes in isolation from one another, recently there has been increased interest in

277 understanding how these separate learning processes interact at the behavioral and neural levels.  
278 Here we find a strong relationship in intersubject variability between error-based and reward-  
279 based motor learning, showing that learning performance across tasks can be explained by a  
280 single, latent variable. Our measures of learning and the nature of the tasks used suggest that  
281 this latent variable captures participants' use of cognitive strategies during learning, with higher  
282 scores on this variable being associated with faster and better overall learning in both tasks. We  
283 further show, using structural neuroimaging and regression analyses with participants'  
284 hippocampus and entorhinal cortical volumes as predictors, that higher scores on this latent  
285 variable, and thus faster and better overall learning, are associated with larger right entorhinal  
286 volume. Together, these findings suggest that a shared strategic process underlies individual  
287 differences in error-based and reward-based motor learning, and that this process is associated  
288 with structural differences in entorhinal cortex.

289  
290 Considerable computational and neural work has argued for a division of labor between the neural  
291 circuits that support error-based and reward-based learning (8, 31, 34, 59–61). According to this  
292 prevailing view, cortico-cerebellar pathways are responsible for error-based learning whereas  
293 cortico-striatal pathways are responsible for reward-based learning. Such distinctions, however,  
294 have often been reliant on indirect comparisons between different studies, and have been  
295 influenced by sampling biases in neural recording sites across different tasks. For instance,  
296 conventional views on error-based learning have suggested that adaptation is a primarily  
297 automatic mechanism, immune to reward-based feedback (8, 34). However, more recent  
298 behavioral evidence suggests that these two learning processes, while separable (62, 63),  
299 interact during sensorimotor learning (7, 64–66). Such interactions are likely to be supported by  
300 the recent demonstration of direct anatomical connections between the cerebellum and striatum  
301 (67). These bidirectional connections could explain recent neural findings from rodents showing  
302 that the cerebellum, besides processing direction-related errors, also represents various aspects  
303 of reward-related information during task performance (68–71). Together, this emerging evidence  
304 suggests that error-based and reward-based learning processes are closely intertwined at both  
305 the behavioral and neural levels.

306  
307 There is also emerging evidence to suggest that both error-based and reward-based processes  
308 are mediated through the use of cognitive strategies implemented during learning. In error-based  
309 adaptation, the contribution of this explicit, declarative process to learning has been well-  
310 established behaviorally (2, 3, 13, 19, 23, 24, 72). Recent evidence from our group further

311 indicates that faster learning across participants is linked to individual differences in the magnitude  
312 of the cognitive strategy (3), which drives rapid changes early in the learning process. In reward-  
313 based learning, by contrast, the contribution of cognitive strategies have received comparably  
314 little attention, and is only beginning to be established. As one example, recent work (36) using a  
315 visuomotor rotation task, wherein participants were only provided with reward-based feedback  
316 (binary success/failure), has shown that good versus poor learning is related to the  
317 implementation of a large cognitive component. This was evidenced by the observed reduction in  
318 reach angle when participants were required to remove their aiming strategy (see also 35). It was  
319 also evidenced by the observation that the reward-based learning was impaired when (1)  
320 participants had to perform a dual task (a separate mental rotation task) that divided their cognitive  
321 load (36), or when (2) participants' reaction times were constrained (35), such that they could not  
322 implement the strategy (72). To date, work examining the link between error- and reward-based  
323 (63, 64, 66), has focused on how reinforcement signals (e.g., binary success/failure) shape both  
324 forms of learning. By contrast, our current behavioral findings show that, even when distinct  
325 reward- and error-based learning tasks are used, there is a single latent variable that explains a  
326 significant proportion of intersubject variability in performance across both types of learning.

327  
328 We found that a larger right entorhinal volume was associated with better overall learning in both  
329 the reward-based and error-based motor learning tasks. The entorhinal cortex has been shown  
330 to support a wide range of cognitive functions that would have bearing on various features of our  
331 motor learning tasks. Classically, the entorhinal cortex, together with neighboring areas in the  
332 medial temporal lobe, has been implicated in spatial navigation and memory through  
333 electrophysiological studies in rodents. These studies showed that place cells in the hippocampus  
334 (73) and grid cells in the entorhinal cortex (74) form a map-like representation of the environment.  
335 Grid cells have also been demonstrated in primate entorhinal cortex, even in the absence of  
336 locomotion, when the animal is simply exploring a visual scene with its eyes (75, 76). Such  
337 observations have recently been extended to humans with functional MRI (77, 78), and there is  
338 even evidence suggesting that mere shifts in covert attention (i.e., in the absence of overt eye  
339 movements), also elicits grid-cell-like responses in the entorhinal cortex (79). Together, these and  
340 other findings (51, 52, 80) have begun to reshape our understanding of the role of the entorhinal  
341 cortex in visual-spatial memory, and more generally in cognitive operations. An influential  
342 hypothesis is that the hippocampal-entorhinal system supports a cognitive map, an idea that was  
343 originally proposed to explain findings in rodents (55, 56) and later extended to humans (for review

344 see 81). This hypothesis proposes that the brain creates flexible representations of the  
345 environment to not only support memory but also guide effective (motor) behavior (42, 82, 83).

346  
347 In the context of the current study, we expect cognitive and spatial maps to be utilized during the  
348 exploration of visuomotor space in our curve drawing and visuomotor rotation tasks. Studies using  
349 fMRI in healthy adults, and neural recordings or electrical stimulation in pre-surgical patients, have  
350 provided evidence that the entorhinal cortex supports the encoding of goal direction and distance,  
351 relative locations, and the clockwise or counterclockwise direction of routes (84–90). While our  
352 motor learning tasks did not involve navigation in VR, the encoding of goal directions (in the  
353 visuomotor rotation task) and trajectories to the goal (in the curve drawing task) were critical to  
354 learning. If the entorhinal cortex is important for representing such spatial information, then its  
355 size may predict the ability to perform tasks — perceptual and motor — that recruit such  
356 representations. Studies investigating the relation between neuroanatomy and performance have  
357 associated greater gray matter volume in the entorhinal cortex with better scene recognition (46),  
358 spatial memory (45), navigation to memorized object locations in VR (47), as well as the lifetime  
359 amount of video gaming (91). Here, we extend these general observations to include the domain  
360 of motor learning, showing an association between entorhinal volume and overall performance in  
361 error-based and reward-based learning tasks. Although the basis for our lateralized right  
362 hemispheric effects are unclear, we find it noteworthy that it is primarily the right, and not left,  
363 regions of the medial temporal lobe that are associated with the processing of spatial information  
364 (92).

## 365 **Methods**

366 This study was part of a larger cohort study (registered at <https://osf.io/y8649>) in which 66 right-  
367 handed paid volunteers underwent structural and resting state MRI scans. We anticipated that a  
368 subgroup of ~40 participants would agree to perform the error-based and reward-based motor  
369 learning tasks following participation in this main study. Thirty-four participants (18 men and 16  
370 women, aged 20-35 years) actually took part in these separate sessions (51 days before to 98  
371 days after the MRI session, mean absolute difference 38 days). One of these participants was  
372 excluded from further analysis because of a high number of invalid trials in the error-based  
373 learning task (>25%), thus leaving 33 participants for analysis.

374

375 The main experiment and motor learning follow-up tasks were approved by the Queen's  
376 University Health Sciences Research Ethics Board, and participants provided written informed  
377 consent before participating in the MRI session and in the motor learning sessions. The methods  
378 and data analyses for the current study are pre-registered on OSF (<https://osf.io/7prq5>).

## 379 **Neuroimaging**

### 380 Procedure

381 The day prior to each participants' MRI scan, participants completed a biofeedback session in a  
382 simulated (mock) MRI scanner to become familiar with the MRI environment and to learn to  
383 minimize head movement. During the biofeedback session, participants viewed a 45-minute  
384 documentary with a live readout trace of their head motion overlaid. When their head motion  
385 exceeded an adaptive threshold, the documentary was paused for several seconds while static  
386 was played on the screen along with a loud, unpleasant noise. The next day, MRI data were  
387 collected over the course of a 1.5-hour session using a 3T whole-body MRI scanner (Magnetom  
388 Tim Trio; Siemens Healthcare). We gathered high-resolution whole-brain T1-weighted (repetition  
389 time [TR] 2400 ms; echo time [TE] 2.13 ms; flip angle 8°; echo spacing 6.5 ms) and T2-weighted  
390 (TR 3200 ms; TE 567 ms; variable flip angle; echo spacing 3.74 ms) anatomical images (in-plane  
391 resolution 0.7 × 0.7 mm<sup>2</sup>; 320 × 320 matrix; slice thickness 0.7 mm; 256 AC-PC transverse slices;  
392 anterior-to-posterior encoding; 2 × acceleration factor) and an ultra-high resolution T2-weighted  
393 volume centred on the medial temporal lobes (resolution 0.5 × 0.5 mm<sup>2</sup>; 384 × 384 matrix; slice  
394 thickness 0.5 mm; 104 transverse slices acquired parallel to the hippocampus long axis; anterior-  
395 to-posterior encoding; 2 × acceleration factor; TR 3200 ms; TE 351 ms; variable flip angle; echo  
396 spacing 5.12 ms). The whole brain protocols were selected on the basis of protocol optimizations  
397 designed by Sortiropoulos and colleagues (93). The hippocampal protocols were modeled after  
398 Chadwick and colleagues (94). In addition, we acquired two sets (right-left direction and left-right  
399 direction) of whole-brain diffusion-weighted volumes (64 directions, b = 1200 s/mm<sup>2</sup>, 93 slices,  
400 voxel size = 1.5 × 1.5 × 1.5 mm<sup>3</sup>, TR 5.18 s, TE 103.4 ms; 3 times multiband acceleration), plus  
401 two extra B0 scans gathered separately for each orientation.

### 402 Data analysis

403 Automated cortical and subcortical segmentation of the T1-weighted and T2-weighted brain data  
404 was performed in Freesurfer (v6.0) (95, 96). For each hemisphere, we obtained the volume of the  
405 hippocampus (HC) and entorhinal cortex (EC) in the MTL for our main analysis. We also obtained

406 striatal volumes, including left and right globus pallidus, putamen, caudate and accumbens for  
407 exploratory analyses (see *Supplemental Information*). Segmentations of these areas were  
408 checked visually and manually adjusted if necessary.

409  
410 In addition to the Freesurfer segmentations, we obtained separate volumetric measures of the  
411 anterior and posterior hippocampus in each hemisphere. The ultra-high-resolution T2-weighted  
412 0.5mm isotropic medial temporal lobe scans were submitted to automated segmentation using  
413 HIPS, an algorithm previously validated to human raters specialized in segmenting detailed  
414 neuroanatomical scans of the hippocampus (97). Three independent raters were trained on  
415 segmenting the hippocampus at the uncus apex into aHC and pHC segments, and achieved a  
416 Dice coefficient of absolute agreement of 80%. Two of these raters independently segmented all  
417 participants using the 0.5 mm T1-weighted scans. The T2-weighted medial temporal lobe scans  
418 were registered to the T2-weighted whole-brain scans, which were in turn registered to the T1-  
419 weighted whole-brain scans, and the combined transform was used to place the rater landmarks  
420 on the detailed medial temporal lobe scans. Finally, the total number of voxels in each subregion  
421 was multiplied by the volume of each voxel to obtain a total aHC and pHC volume.

422  
423 To account for differences in head size, all regional volumes were corrected for total intracranial  
424 (IC) volume obtained from Freesurfer. This was done by first estimating the slope  $b$  of the  
425 regression line of each regional volume on the IC volume across the 33 participants included in  
426 the analysis. Next, each regional volume was adjusted for the IC volume as: adjusted volume =  
427 raw volume -  $b \times (\text{IC volume} - \text{mean IC volume})$ .

## 428 ***Motor Learning Tasks***

### 429 Procedure

430 Thirty-four participants performed an error-based and a reward-based motor learning task. We  
431 attempted to fully counterbalance the tasks across participants; The first 19 participants  
432 performed the error-based motor learning task before performing the reward-based motor  
433 learning task, with the next 15 participants performing the reward-based motor learning task  
434 before the error-based motor learning task. The reward-based task took about 25 minutes to  
435 complete and the error-based task took about 65 minutes to complete.

## 436 Setup

437 Participants were seated at a table, with their chin and forehead supported by a headrest placed  
438 ~50 cm in front of a vertical LCD monitor (display size 47.5 × 26.5 cm; resolution 1920 × 1080  
439 pixels) on which the stimuli were presented (Fig. 1A). Participants performed reaching movements  
440 by sliding a stylus across a digital drawing tablet (active area 311 × 216 mm; Wacom Intuous)  
441 placed on the table in front of the participant. Movement trajectories were sampled at 100 Hz by  
442 the digitizing tablet. Vision of the hand and tablet was occluded by a piece of black cardboard  
443 attached to the headrest. In the error-based learning task, eye movements were tracked at 500  
444 Hz using a video-based eye tracker (Eyelink 1000; SR Research) placed beneath the monitor.  
445 The eye movement data were not analyzed in this study. The stimuli and motor learning tasks are  
446 described in detail below.

## 447 Reward-based motor learning

### 448 Task

449 The task was inspired by the reward-based learning task designed by Dam and colleagues (57).  
450 Participants performed reaching movements from a start position to a target line by sliding the  
451 stylus across the tablet. They were instructed to “find an invisible curved path by drawing paths  
452 on the tablet and evaluating your score for each attempt”. Participants started with a practice  
453 block of 10 trials, in which they traced a visible, straight line between the start position and the  
454 target, to become familiar with the task and the timing requirement of performing the movement  
455 within 2 s. Next, participants performed 12 blocks, each containing 20 attempts to copy an invisible  
456 path, which differed in each block.

457  
458 Each trial started with the presentation of a start position (5 mm radius circle). After the participant  
459 had moved the cursor to the start position and held it there for 200 ms, a horizontal target line (30  
460 × 1 mm) would appear 15 cm in front of the start position, and a rectangular outlined box (320 ×  
461 170 mm) would appear around the start position and target (Fig. 1B). Next, participants drew a  
462 path from the start position to the target line while remaining in the box. After crossing the target  
463 line, the cursor disappeared, and a score between 0 and 100 was displayed centrally (for 1 s),  
464 indicating how close they were to the invisible path. Following this, all stimuli disappeared, and a  
465 new trial would start with the presentation of the start position and the reappearance of the cursor.  
466 If the movement duration was longer than 2 s, the score was not presented and the trial was  
467 repeated.



468

469 The invisible paths consisted of single curves (i.e., half sine waves; 6 blocks) and double curves  
470 (i.e., full sine waves; 6 blocks) of different amplitudes ( $\pm 0.2$ , 0.5 and 0.8 times the target distance),  
471 drawn between the start position and the center of the target line. Participants were not informed  
472 about the possible shapes of the invisible lines. The trial score was computed by taking the x  
473 position of the cursor at every cm travelled in the y-direction (i.e., 1, 2, 3, ... and 15 cm), and  
474 computing the absolute difference in x position between the cursor and the invisible line at the  
475 corresponding y-distance. The sum of these errors was then normalized by dividing it by the sum  
476 of distances between a straight line and a curve with an amplitude of 0.5 times the target distance,  
477 and multiplied by 100 to obtain a score between 0 and 100 (negative scores were presented as  
478 0).

479

480 All participants performed one practice block and 12 experimental blocks of trials. Ten different  
481 randomized orders of experimental blocks were created. Participant 1, 11, 21, and 31 performed  
482 the first order, participant 2, 12, 22, and 32 performed the second order, etc.

## 483 Data analysis

484 The median score in trials 11 to 20 of each block of 20 attempts were used as a measure of  
485 learning performance. We did not use trials 1-10 in our analysis based on our observation that,  
486 for participants who learned fairly quickly, they often used exploratory strategies when  
487 encountering a new path, which frequently resulted in scores of, or around, zero (Fig. 2A provides  
488 a good example of such a participant). For each participant, we averaged the median scores  
489 across single curves with the same amplitude (i.e. 'leftward' and 'rightward' curves) and across  
490 double curves with the same amplitude. This resulted in six scores per participant.

## 491 Error-based motor learning

### 492 Task

493 Participants performed center-out reaching movements from a start position to one of eight visual  
494 targets presented on a 10 cm radius ring around the start position. Participants were instructed to  
495 hit the target with their cursor by making a fast reaching movement on the tablet, 'slicing' through  
496 the target. The ratio between movement of the tip of the stylus and movement of the cursor  
497 presented on the screen was 1:2, so that a movement of 5 cm on the tablet corresponded to a  
498 movement of 10 cm of the cursor. Participants first performed a baseline block in which they

499 received veridical feedback about the position of the tip of the stylus, shown as a cursor on the  
500 screen. After performing a baseline block, participants performed a visuomotor rotation task, a  
501 task that has been used extensively to assess error-based learning (e.g., 58, 98). In this task, the  
502 movement of the cursor representing the hand position is rotated about the hand start location, in  
503 this experiment by 45° clockwise, requiring that a counterclockwise adjustment of movement  
504 direction be learned.

505  
506 Each trial started with the participant moving the stylus to a central start position (5 mm radius  
507 circle). When the (unseen) cursor was within 5 cm of the start position, a ring was presented  
508 around the start position to indicate the distance of the cursor, so that the participant had to reduce  
509 the size of the ring to move to the start position. The cursor (4 mm radius circle) appeared when  
510 the cursor ‘touched’ the start position (9 mm distance). After the cursor was held within the start  
511 position for 500 ms, the target (6 mm radius open circle) was presented on an (imaginary) 10 cm  
512 radius ring around the start position at one of eight locations, separated by 45° (i.e., 0, 45, 90,  
513 135, 180, 225, 270 and 315°). In addition, 64 non-target ‘landmarks’ (3 mm radius outlined circles,  
514 spaced 5.625° apart) were presented, forming a 10 cm radius ring around the start position. After  
515 a 2 s delay, the target would ‘fill in’ (i.e., color red), providing the cue for the participant to perform  
516 a fast movement to the target. If the participant started the movement before the cue, or more  
517 than 1 s after the cue, the trial was aborted and a feedback message indicating “Too early” or  
518 “Too late” appeared on the screen, respectively. In correctly timed trials, the cursor was visible  
519 during the movement to the ring and then became stationary for 1 s when it reached the ring,  
520 providing the participant with visual feedback of their endpoint error. When any part of the cursor  
521 overlapped with any part of the target, the target would color green to indicate a hit. If the duration  
522 of the movement was longer than 300 ms, a feedback message “Too slow” would appear on the  
523 screen.

524  
525 In trials in the rotation block, the movement of the cursor was rotated by 45° clockwise around the  
526 start position. To assess the contribution of the explicit process of learning, participants performed  
527 several ‘reporting’ trials. These trials were performed at the end of the first rotation block to ensure  
528 that participants’ learning behavior would not be influenced, as the reporting procedure itself can  
529 increase the proportion of participants that implement a cognitive strategy (3). In reporting trials,  
530 participants were instructed to, before each reach movement, report the aiming direction of their  
531 hand for the cursor to hit the target. They did this by turning a knob with their left hand, to rotate  
532 a line on the screen, positioned between the start position and the ring, to align it with their

533 strategic aimpoint. When satisfied with the direction of the line, the participant clicked a button  
534 positioned next to the knob, and the line disappeared. After a 1 s delay, the target filled in as a  
535 cue to execute the reach.

536  
537 All participants performed 4 blocks of trials in total, where within each block, target locations were  
538 randomized within sets of eight: (1) A baseline block (5 sets of 8 trials; 40 in total), (2) a rotation  
539 block (10 sets of 8 trials without report + 2 sets of 8 reporting trials + 2 sets of 8 trials without  
540 report; 112 trials in total), (3) a washout block in which veridical cursor feedback was restored (10  
541 + 10 sets with a 30 s break in between; 160 trials in total) and (4) a second rotation block to  
542 assess participants' rates of re-learning (10 sets of 8 trials; 80 in total). Ten different randomized  
543 trial orders were created for the full experiment. Participant 1, 11, 21, and 31 performed the first  
544 order, participant 2, 12, 22, and 32 performed the second order, etc.

#### 545 Data analysis

546 Trials in which the movement was initiated too early or too late (as detected online; 4% of trials)  
547 or in which the movement duration was longer than 300 ms (4% of trials), were discarded from  
548 the analysis. The median endpoint hand angle (i.e., the difference in angle between the target  
549 and the hand when the cursor crossed the ring) per set of eight trials was used as a measure of  
550 learning performance. For each participant, we computed early and late learning scores in the  
551 first rotation block, washout block, and second rotation block. To do this, we averaged the median  
552 in sets 2 and 3 and in sets 9 and 10 of each of these blocks (excluding the first set in which  
553 participants often showed highly variable behavior). To derive a measure of the magnitude of the  
554 explicit component of learning, we used the average of the median reported aiming angle with  
555 respect to the target, obtained in the reporting trials (sets 11 and 12 in the rotation block). This  
556 resulted in seven measures per participant.

#### 557 Relating learning measures and neuroanatomy

558 Since the learning scores within and between the two learning tasks showed significant  
559 correlations across participants, we first submitted the scores to a principal component analysis  
560 (PCA) to obtain measures of learning performance across single dimensions. To do this, we first  
561 transformed the variables. For the error-based learning task, all angles were converted to  
562 absolute errors with respect to the target, and then multiplied by -1 so that positive values  
563 correspond to better performance. We then standardized all scores before submitting them to the  
564 PCA. The principal components (PCs) were obtained using the `pca` function in Matlab, which uses

565 a singular value decomposition algorithm. PCA reduces the dimensionality of the data by finding  
566 PCs that capture the maximal variance in the data.

567  
568 To test the hypothesis that better performance in the motor learning tasks is related to greater  
569 volumes of brain areas in the medial temporal lobe, we performed multiple linear regression  
570 analyses. All models were estimated using the fitlm function in Matlab, which returns a least-  
571 squares fit of the scores to the data. Our primary analysis included the left and right HC and EC  
572 volumes. To control for a potential effect of overall head size on learning performance, we also  
573 included each participant's total intracranial volume, making a total of five neuroanatomical  
574 measures. For the first and second PC, we fitted a multiple linear regression model with the PC  
575 as the dependent variable, and the set of four regional volumes plus the IC volume as predictors.  
576 Previous studies have reported differential relationships between the anterior and posterior parts  
577 of the hippocampus and memory (e.g., 50). Therefore, we performed a secondary analysis,  
578 including the left and right anterior and posterior HC volume as predictors, and the IC volume as  
579 a confounder.

## 580 **Author contributions**

581 Conceptualization and methodology AJdB, JP, JPG, JRF; investigation AJdB; software AJdB;  
582 formal analysis AJdB, JP, MRR; visualization AJdB, JPG, MRR; writing - original draft AJdB,  
583 JPG; writing - review and editing AJdB, JP, JPG, JRF, MRR; supervision AJdB, JP, JPG; project  
584 administration AJdB, JP, JPG; resources JP, JPG, JRF; funding acquisition JP, JPG, JRF.

585

## 586 **Acknowledgements**

587 The authors thank Mohammed Albaghdadi, Olivia Broda, Sydney Dore, Kate McKenzie and  
588 Reem Toubache for help with data collection, and Martin York for technical support.

## References

1. H. G. Wu, Y. R. Miyamoto, L. N. Gonzalez Castro, B. P. Ölveczky, M. A. Smith, Temporal structure of motor variability is dynamically regulated and predicts motor learning ability. *Nat. Neurosci.* **17**, 312–321 (2014).
2. J. Fernandez-Ruiz, W. Wong, I. T. Armstrong, J. R. Flanagan, Relation between reaction time and reach errors during visuomotor adaptation. *Behav. Brain Res.* **219**, 8–14 (2011).
3. A. J. de Brouwer, M. Albaghdadi, J. R. Flanagan, J. P. Gallivan, Using gaze behavior to parcellate the explicit and implicit contributions to visuomotor learning. *J. Neurophysiol.* **120**, 1602–1615 (2018).
4. A. Stark-Inbar, M. Raza, J. A. Taylor, R. B. Ivry, Individual differences in implicit motor learning: task specificity in sensorimotor adaptation and sequence learning. *J. Neurophysiol.* **117**, 412–428 (2017).
5. K. M. Trewartha, A. Garcia, D. M. Wolpert, J. R. Flanagan, Fast but fleeting: adaptive motor learning processes associated with aging and cognitive decline. *J. Neurosci.* **34**, 13411–13421 (2014).
6. J. A. Anguera, P. A. Reuter-Lorenz, D. T. Willingham, R. D. Seidler, Contributions of spatial working memory to visuomotor learning. *J. Cogn. Neurosci.* **22**, 1917–1930 (2010).
7. J. A. Taylor, R. B. Ivry, Cerebellar and prefrontal cortex contributions to adaptation, strategies, and reinforcement learning. *Prog. Brain Res.* **210**, 217–253 (2014).
8. K. Doya, Complementary roles of basal ganglia and cerebellum in learning and motor control. *Curr. Opin. Neurobiol.* **10**, 732–739 (2000).
9. H. Lalazar, E. Vaadia, Neural basis of sensorimotor learning: modifying internal models. *Curr. Opin. Neurobiol.* **18**, 573–581 (2008).
10. R. D. Seidler, J. Bo, J. A. Anguera, Neurocognitive contributions to motor skill learning: the role of working memory. *J. Mot. Behav.* **44**, 445–453 (2012).
11. S. Corkin, Acquisition of motor skill after bilateral medial temporal-lobe excision. *Neuropsychologia* **6**, 255–265 (1968).
12. B. Milner, “Memory disturbance after bilateral hippocampal lesions” in *Cognitive Processes and the Brain*, P. M. Milner, S. E. Glickman, Eds. (Van Nostrand, 1965), pp. 97–111.
13. J. A. Taylor, R. B. Ivry, Flexible cognitive strategies during motor learning. *PLoS Comput. Biol.* **7**, e1001096 (2011).
14. P. Mazzoni, J. W. Krakauer, An implicit plan overrides an explicit strategy during visuomotor adaptation. *J. Neurosci.* **26**, 3642–3645 (2006).
15. A. Keisler, R. Shadmehr, A shared resource between declarative memory and motor memory. *J. Neurosci.* **30**, 14817–14823 (2010).

16. S. Werner, O. Bock, Effects of variable practice and declarative knowledge on sensorimotor adaptation to rotated visual feedback. *Exp. Brain Res.* **178**, 554–559 (2007).
17. R. Shadmehr, M. A. Smith, J. W. Krakauer, Error correction, sensory prediction, and adaptation in motor control. *Annu. Rev. Neurosci.* **33**, 89–108 (2010).
18. D. M. Wolpert, J. Diedrichsen, J. R. Flanagan, Principles of sensorimotor learning. *Nat. Rev. Neurosci.* **12**, 739–751 (2011).
19. J. A. Taylor, J. W. Krakauer, R. B. Ivry, Explicit and implicit contributions to learning in a sensorimotor adaptation task. *J. Neurosci.* **34**, 3023–3032 (2014).
20. S. M. Morton, A. J. Bastian, Cerebellar contributions to locomotor adaptations during splitbelt treadmill walking. *J. Neurosci.* **26**, 9107–9116 (2006).
21. M. A. Smith, R. Shadmehr, Intact ability to learn internal models of arm dynamics in Huntington’s disease but not cerebellar degeneration. *J. Neurophysiol.* **93**, 2809–2821 (2005).
22. Y.-W. Tseng, J. Diedrichsen, J. W. Krakauer, R. Shadmehr, A. J. Bastian, Sensory prediction errors drive cerebellum-dependent adaptation of reaching. *J. Neurophysiol.* **98**, 54–62 (2007).
23. G. M. Redding, B. Wallace, Adaptive coordination and alignment of eye and hand. *J. Mot. Behav.* **25**, 75–88 (1993).
24. K. M. Bond, J. A. Taylor, Flexible explicit but rigid implicit learning in a visuomotor adaptation task. *Journal of Neurophysiology* **113**, 3836–3849 (2015).
25. J. R. Morehead, J. A. Taylor, D. E. Parvin, R. B. Ivry, Characteristics of Implicit Sensorimotor Adaptation Revealed by Task-irrelevant Clamped Feedback. *J. Cogn. Neurosci.* **29**, 1061–1074 (2017).
26. V. Della-Maggiore, A. R. McIntosh, Time course of changes in brain activity and functional connectivity associated with long-term adaptation to a rotational transformation. *J. Neurophysiol.* **93**, 2254–2262 (2005).
27. A. Floyer-Lea, P. M. Matthews, Changing brain networks for visuomotor control with increased movement automaticity. *J. Neurophysiol.* **92**, 2405–2412 (2004).
28. R. Shadmehr, H. H. Holcomb, Neural correlates of motor memory consolidation. *Science* **277**, 821–825 (1997).
29. J. Doyon, H. Benali, Reorganization and plasticity in the adult brain during learning of motor skills. *Curr. Opin. Neurobiol.* **15**, 161–167 (2005).
30. P. Dayan, Y. Niv, Reinforcement learning: the good, the bad and the ugly. *Curr. Opin. Neurobiol.* **18**, 185–196 (2008).
31. M. Ito, K. Doya, Multiple representations and algorithms for reinforcement learning in the cortico-basal ganglia circuit. *Curr. Opin. Neurobiol.* **21**, 368–373 (2011).
32. R. S. Sutton, A. G. Barto, *Reinforcement Learning: An Introduction* (A Bradford Book,

- 2018).
33. J. R. Wickens, J. N. J. Reynolds, B. I. Hyland, Neural mechanisms of reward-related motor learning. *Curr. Opin. Neurobiol.* **13**, 685–690 (2003).
  34. R. Shadmehr, J. W. Krakauer, A computational neuroanatomy for motor control. *Exp. Brain Res.* **185**, 359–381 (2008).
  35. O. Codol, P. J. Holland, J. M. Galea, The relationship between reinforcement and explicit control during visuomotor adaptation. *Sci. Rep.* **8**, 9121 (2018).
  36. P. Holland, O. Codol, J. M. Galea, Contribution of explicit processes to reinforcement-based motor learning. *J. Neurophysiol.* **119**, 2241–2255 (2018).
  37. K. Duncan, B. B. Doll, N. D. Daw, D. Shohamy, More Than the Sum of Its Parts: A Role for the Hippocampus in Configural Reinforcement Learning. *Neuron* **98**, 645–657.e6 (2018).
  38. S. J. Gershman, N. D. Daw, Reinforcement Learning and Episodic Memory in Humans and Animals: An Integrative Framework. *Annu. Rev. Psychol.* **68**, 101–128 (2017).
  39. N. Burgess, E. A. Maguire, J. O’Keefe, The Human Hippocampus and Spatial and Episodic Memory. *Neuron* **35**, 625–641 (2002).
  40. L. R. Squire, S. Zola-Morgan, The medial temporal lobe memory system. *Science* **253**, 1380–1386 (1991).
  41. H. Eichenbaum, N. J. Cohen, Can we reconcile the declarative memory and spatial navigation views on hippocampal function? *Neuron* **83**, 764–770 (2014).
  42. J. L. S. Bellmund, P. Gärdenfors, E. I. Moser, C. F. Doeller, Navigating cognition: Spatial codes for human thinking. *Science* **362** (2018).
  43. K. M. Rodrigue, N. Raz, Shrinkage of the entorhinal cortex over five years predicts memory performance in healthy adults. *J. Neurosci.* **24**, 956–963 (2004).
  44. A. P. Yonelinas, *et al.*, Memory in the aging brain: doubly dissociating the contribution of the hippocampus and entorhinal cortex. *Hippocampus* **17**, 1134–1140 (2007).
  45. T. Hartley, R. Harlow, An association between human hippocampal volume and topographical memory in healthy young adults. *Front. Hum. Neurosci.* **6**, 338 (2012).
  46. A. S. Whiteman, D. E. Young, A. E. Budson, C. E. Stern, K. Schon, Entorhinal volume, aerobic fitness, and recognition memory in healthy young adults: A voxel-based morphometry study. *Neuroimage* **126**, 229–238 (2016).
  47. K. R. Sherrill, E. R. Chrastil, I. Aselcioglu, M. E. Hasselmo, C. E. Stern, Structural Differences in Hippocampal and Entorhinal Gray Matter Volume Support Individual Differences in First Person Navigational Ability. *Neuroscience* **380**, 123–131 (2018).
  48. V. R. Schinazi, D. Nardi, N. S. Newcombe, T. F. Shipley, R. A. Epstein, Hippocampal size predicts rapid learning of a cognitive map in humans. *Hippocampus* **23**, 515–528 (2013).
  49. T. I. Brown, A. S. Whiteman, I. Aselcioglu, C. E. Stern, Structural differences in

- hippocampal and prefrontal gray matter volume support flexible context-dependent navigation ability. *J. Neurosci.* **34**, 2314–2320 (2014).
50. E. A. Maguire, *et al.*, Navigation-related structural change in the hippocampi of taxi drivers. *Proc. Natl. Acad. Sci. U. S. A.* **97**, 4398–4403 (2000).
  51. A. J. Horner, J. A. Bisby, E. Zotow, D. Bush, N. Burgess, Grid-like Processing of Imagined Navigation. *Curr. Biol.* **26**, 842–847 (2016).
  52. A. O. Constantinescu, J. X. O'Reilly, T. E. J. Behrens, Organizing conceptual knowledge in humans with a gridlike code. *Science* **352**, 1464–1468 (2016).
  53. D. Aronov, R. Nevers, D. W. Tank, Mapping of a non-spatial dimension by the hippocampal-entorhinal circuit. *Nature* **543**, 719–722 (2017).
  54. R. M. Tavares, *et al.*, A Map for Social Navigation in the Human Brain. *Neuron* **87**, 231–243 (2015).
  55. E. C. Tolman, Cognitive maps in rats and men. *Psychol. Rev.* **55**, 189–208 (1948).
  56. J. O'Keefe, L. Nadel, *The hippocampus as a cognitive map* (Oxford University Press, USA, 1978).
  57. G. Dam, K. Kording, K. Wei, Credit assignment during movement reinforcement learning. *PLoS One* **8**, e55352 (2013).
  58. H. A. Cunningham, Aiming error under transformed spatial mappings suggests a structure for visual-motor maps. *J. Exp. Psychol. Hum. Percept. Perform.* **15**, 493–506 (1989).
  59. K. Doya, What are the computations of the cerebellum, the basal ganglia and the cerebral cortex? *Neural Netw.* **12**, 961–974 (1999).
  60. N. D. Daw, K. Doya, The computational neurobiology of learning and reward. *Curr. Opin. Neurobiol.* **16**, 199–204 (2006).
  61. H. Makino, E. J. Hwang, N. G. Hedrick, T. Komiyama, Circuit Mechanisms of Sensorimotor Learning. *Neuron* **92**, 705–721 (2016).
  62. J. Izawa, R. Shadmehr, Learning from sensory and reward prediction errors during motor adaptation. *PLoS Comput. Biol.* **7**, e1002012 (2011).
  63. J. G. A. Cashaback, H. R. McGregor, A. Mohatarem, P. L. Gribble, Dissociating error-based and reinforcement-based loss functions during sensorimotor learning. *PLoS Comput. Biol.* **13**, e1005623 (2017).
  64. L. Shmuelof, *et al.*, Overcoming motor “forgetting” through reinforcement of learned actions. *J. Neurosci.* **32**, 14617–14621 (2012).
  65. A. A. Nikooyan, A. A. Ahmed, Reward feedback accelerates motor learning. *J. Neurophysiol.* **113**, 633–646 (2015).
  66. J. M. Galea, E. Mallia, J. Rothwell, J. Diedrichsen, The dissociable effects of punishment and reward on motor learning. *Nat. Neurosci.* **18**, 597–602 (2015).



67. A. C. Bostan, P. L. Strick, The basal ganglia and the cerebellum: nodes in an integrated network. *Nat. Rev. Neurosci.* **19**, 338–350 (2018).
68. M. J. Wagner, T. H. Kim, J. Savall, M. J. Schnitzer, L. Luo, Cerebellar granule cells encode the expectation of reward. *Nature* **544**, 96–100 (2017).
69. W. Heffley, *et al.*, Coordinated cerebellar climbing fiber activity signals learned sensorimotor predictions. *Nat. Neurosci.* **21**, 1431–1441 (2018).
70. D. Kostadinov, M. Beau, M. Blanco-Pozo, M. Häusser, Predictive and reactive reward signals conveyed by climbing fiber inputs to cerebellar Purkinje cells. *Nat. Neurosci.* **22**, 950–962 (2019).
71. N. Larry, M. Yarkoni, A. Lixenberg, M. Joshua, Cerebellar climbing fibers encode expected reward size. *Elife* **8** (2019).
72. A. M. Haith, D. M. Huberdeau, J. W. Krakauer, The influence of movement preparation time on the expression of visuomotor learning and savings. *J. Neurosci.* **35**, 5109–5117 (2015).
73. J. O’Keefe, J. Dostrovsky, The hippocampus as a spatial map. Preliminary evidence from unit activity in the freely-moving rat. *Brain Research* **34**, 171–175 (1971).
74. T. Hafting, M. Fyhn, S. Molden, M.-B. Moser, E. I. Moser, Microstructure of a spatial map in the entorhinal cortex. *Nature* **436**, 801–806 (2005).
75. N. J. Killian, M. J. Jutras, E. A. Buffalo, A map of visual space in the primate entorhinal cortex. *Nature* **491**, 761–764 (2012).
76. N. J. Killian, S. M. Potter, E. A. Buffalo, Saccade direction encoding in the primate entorhinal cortex during visual exploration. *Proc. Natl. Acad. Sci. U. S. A.* **112**, 15743–15748 (2015).
77. J. B. Julian, A. T. Keinath, G. Frazzetta, R. A. Epstein, Human entorhinal cortex represents visual space using a boundary-anchored grid. *Nat. Neurosci.* **21**, 191–194 (2018).
78. M. Nau, T. Navarro Schröder, J. L. S. Bellmund, C. F. Doeller, Hexadirectional coding of visual space in human entorhinal cortex. *Nat. Neurosci.* **21**, 188–190 (2018).
79. N. Wilming, P. König, S. König, E. A. Buffalo, Entorhinal cortex receptive fields are modulated by spatial attention, even without movement. *Elife* **7** (2018).
80. J. L. S. Bellmund, L. Deuker, T. N. Schröder, C. F. Doeller, Grid-cell representations in mental simulation. *eLife* **5** (2016).
81. R. A. Epstein, E. Z. Patai, J. B. Julian, H. J. Spiers, The cognitive map in humans: spatial navigation and beyond. *Nat. Neurosci.* **20**, 1504–1513 (2017).
82. M. M. Garvert, R. J. Dolan, T. E. Behrens, A map of abstract relational knowledge in the human hippocampal-entorhinal cortex. *Elife* **6** (2017).
83. D. Schiller, *et al.*, Memory and Space: Towards an Understanding of the Cognitive Map. *J. Neurosci.* **35**, 13904–13911 (2015).

84. M. J. Chadwick, A. E. J. Jolly, D. P. Amos, D. Hassabis, H. J. Spiers, A goal direction signal in the human entorhinal/subicular region. *Curr. Biol.* **25**, 87–92 (2015).
85. J. Jacobs, *et al.*, Direct Electrical Stimulation of the Human Entorhinal Region and Hippocampus Impairs Memory. *Neuron* **92**, 983–990 (2016).
86. A. Goyal, *et al.*, Electrical Stimulation in Hippocampus and Entorhinal Cortex Impairs Spatial and Temporal Memory. *J. Neurosci.* **38**, 4471–4481 (2018).
87. J. F. Miller, *et al.*, Neural activity in human hippocampal formation reveals the spatial context of retrieved memories. *Science* **342**, 1111–1114 (2013).
88. J. F. Miller, I. Fried, N. Suthana, J. Jacobs, Repeating Spatial Activations in Human Entorhinal Cortex. *Current Biology* **25**, 1080–1085 (2015).
89. S. E. Qasim, *et al.*, Memory retrieval modulates spatial tuning of single neurons in the human entorhinal cortex. *Nat. Neurosci.* **22**, 2078–2086 (2019).
90. J. Jacobs, M. J. Kahana, A. D. Ekstrom, M. V. Mollison, I. Fried, A sense of direction in human entorhinal cortex. *Proc. Natl. Acad. Sci. U. S. A.* **107**, 6487–6492 (2010).
91. S. Kühn, J. Gallinat, Amount of lifetime video gaming is positively associated with entorhinal, hippocampal and occipital volume. *Mol. Psychiatry* **19**, 842–847 (2014).
92. M. A. Dalton, M. Hornberger, O. Piguet, Material specific lateralization of medial temporal lobe function: An fMRI investigation. *Hum. Brain Mapp.* **37**, 933–941 (2016).
93. S. N. Sotiropoulos, *et al.*, Advances in diffusion MRI acquisition and processing in the Human Connectome Project. *Neuroimage* **80**, 125–143 (2013).
94. M. J. Chadwick, H. M. Bonnici, E. A. Maguire, CA3 size predicts the precision of memory recall. *Proc. Natl. Acad. Sci. U. S. A.* **111**, 10720–10725 (2014).
95. B. Fischl, *et al.*, Whole brain segmentation: automated labeling of neuroanatomical structures in the human brain. *Neuron* **33**, 341–355 (2002).
96. B. Fischl, *et al.*, Automatically parcellating the human cerebral cortex. *Cereb. Cortex* **14**, 11–22 (2004).
97. J. E. Romero, P. Coupé, J. V. Manjón, HIPS: A new hippocampus subfield segmentation method. *Neuroimage* **163**, 286–295 (2017).
98. J. W. Krakauer, C. Ghez, M. F. Ghilardi, Adaptation to visuomotor transformations: consolidation, interference, and forgetting. *J. Neurosci.* **25**, 473–478 (2005).
